# Supplementary material
Source: PubMed Central journal article supplement (PMC1363773)

Adenine

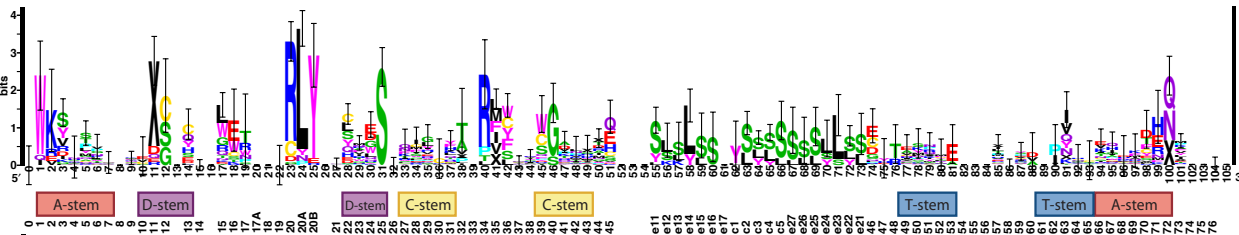

Uracil

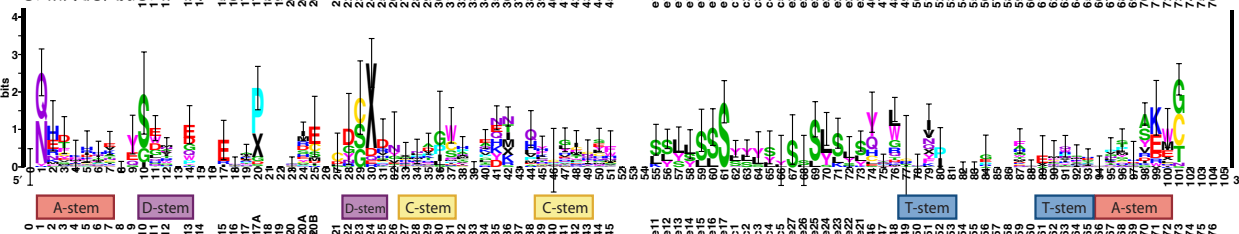

Guanine

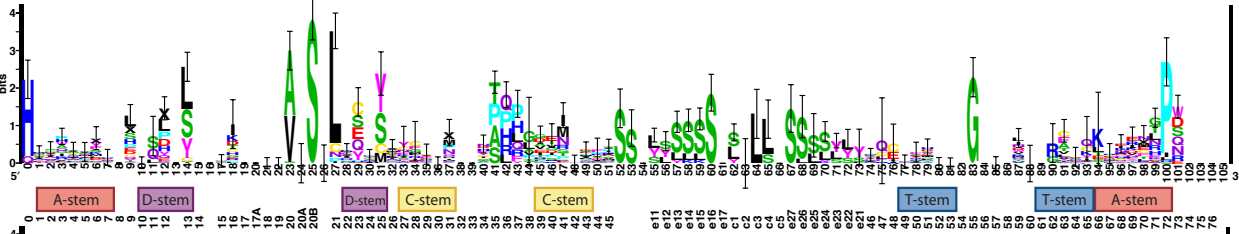

Cytosine

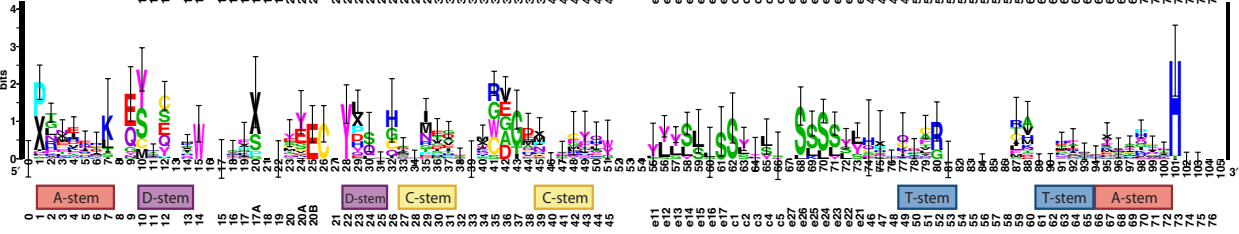

gap

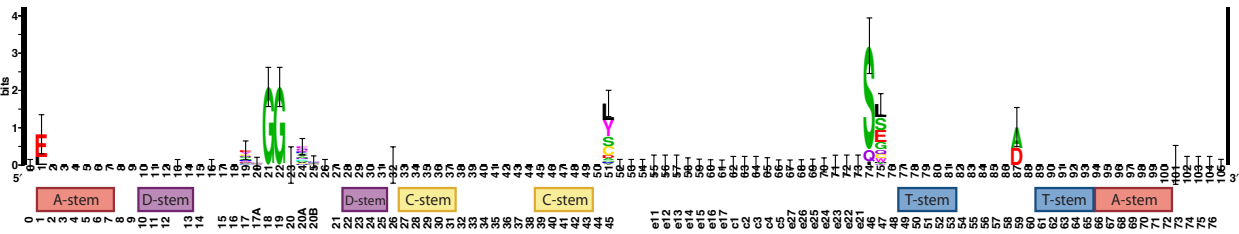

Supplement: nar_34_3_905__1.pdf [file nar_34_3_905__1.pdf]

Adenine

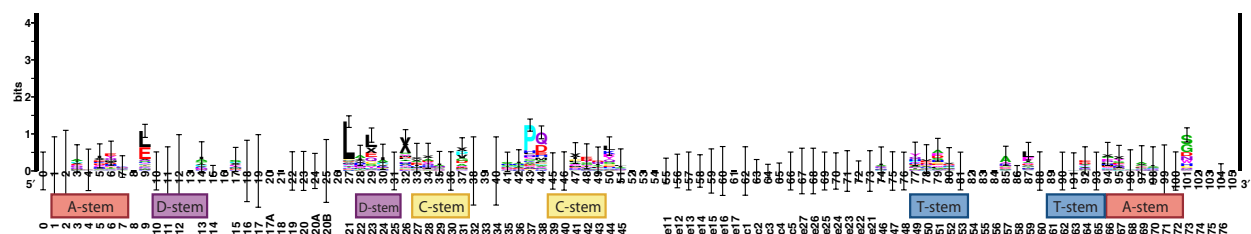

Uracil

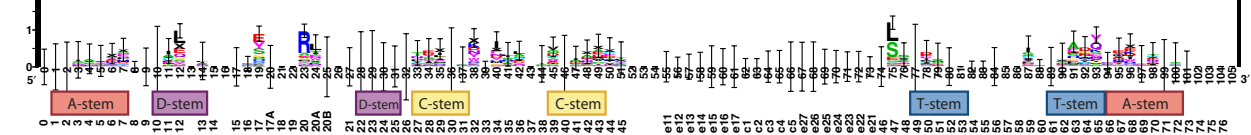

Guanine

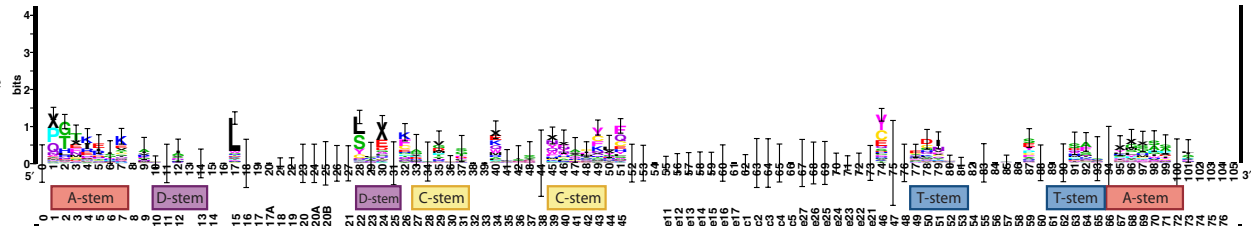

Cytosine

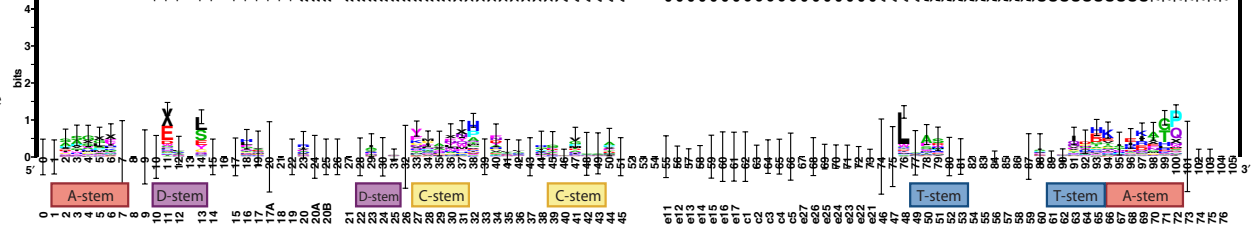

gap

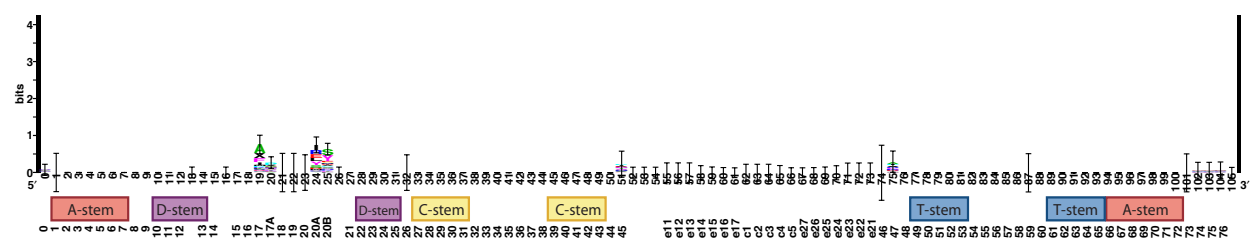

Supplement: nar_34_3_905__2.pdf [file nar_34_3_905__2.pdf]
